# Supplementary material for: Synthesis and Antitumor Activity of a Series of Novel 1-Oxa-4-azaspiro[4,5]deca-6,9-diene-3,8-dione Derivatives
Source: MDPI journal article supplement (doi:10.3390/molecules24050936), 2019-03-07

# Synthesis and Antitumor Activity of a Series of Novel 1-Oxa-4-azaspiro[4,5]deca-6,9-diene-3,8-dione Derivatives

Ze Yang <sup>1,2</sup>, Qiu Zhong <sup>3</sup>, Shilong Zheng <sup>3</sup>, Guangdi Wang <sup>3,\*</sup> and Ling He <sup>1,\*</sup>

<sup>1</sup> Key Laboratory of Drug-Targeting and Drug Delivery System of the Education Ministry, Department of Medicinal Chemistry, West China School of Pharmacy, Sichuan University, Chengdu, Sichuan 610041, China; 2016224055105@stu.scu.edu.cn

<sup>2</sup> Sichuan Engineering Laboratory for Plant-Sourced Drug and Sichuan Research Center for Drug Precision Industrial Technology, Department of Medicinal Chemistry, West China School of Pharmacy, Sichuan University, Chengdu, Sichuan 610041, China

<sup>3</sup> Department of Chemistry, RCMC Cancer Research Center, Xavier University of Louisiana, New Orleans, LA 70125, USA; qzhong@xula.edu (Q.Z.); szheng@xula.edu (S.Z.)

\* Correspondence: gwang@xula.edu (G.W.); heling2012@scu.edu.cn. (L.H.)

## (Supporting Information)

|                                                                                  |         |
|----------------------------------------------------------------------------------|---------|
| <sup>1</sup> H and <sup>13</sup> C NMR spectra of compounds <b>10a–10b</b> ----- | S2–S3   |
| <sup>1</sup> H and <sup>13</sup> C NMR spectra of compounds <b>11a–11k</b> ----- | S4–S14  |
| <sup>1</sup> H and <sup>13</sup> C NMR spectra of compounds <b>12a–12d</b> ----- | S15–S18 |

Compound **10a**

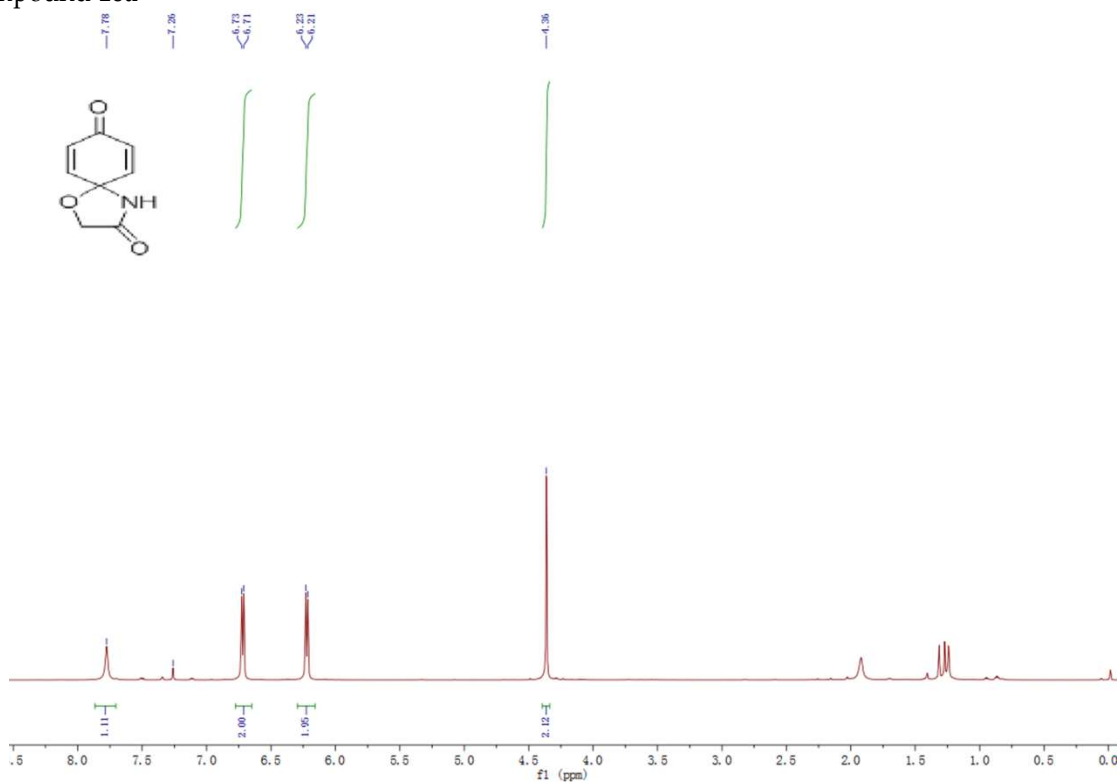

<sup>1</sup>H NMR spectra of compound **10a**

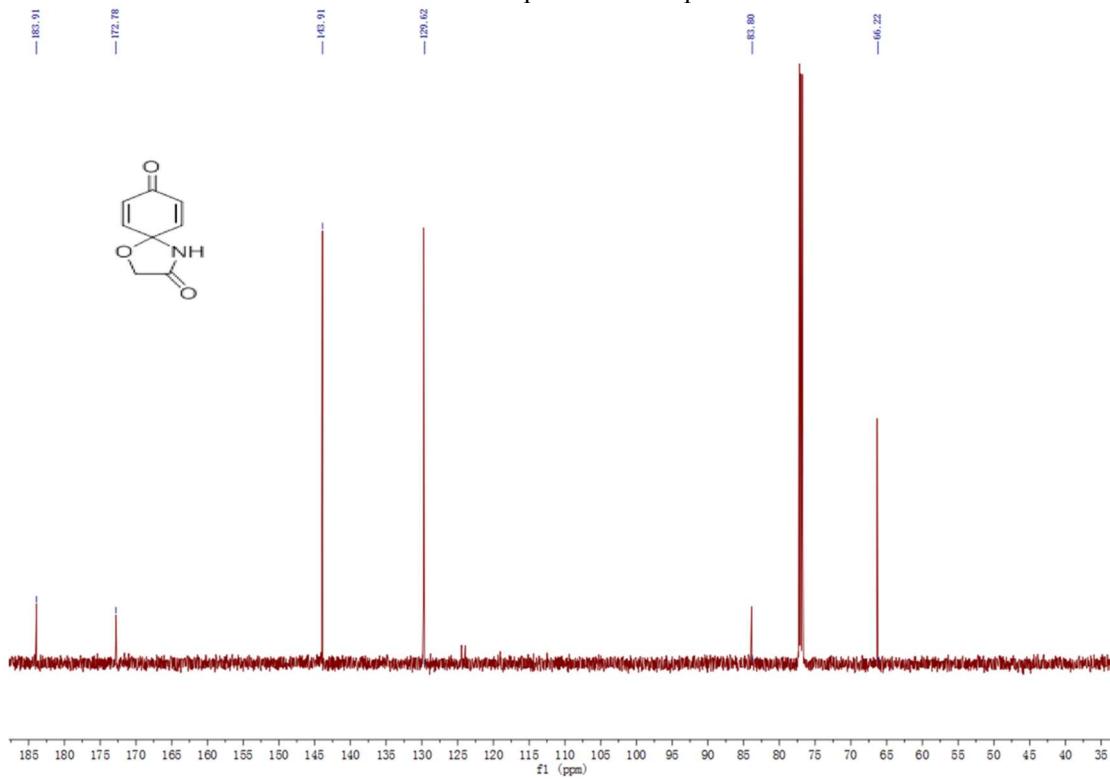

<sup>13</sup>C NMR spectra of compound **10a**

# Compound 10b

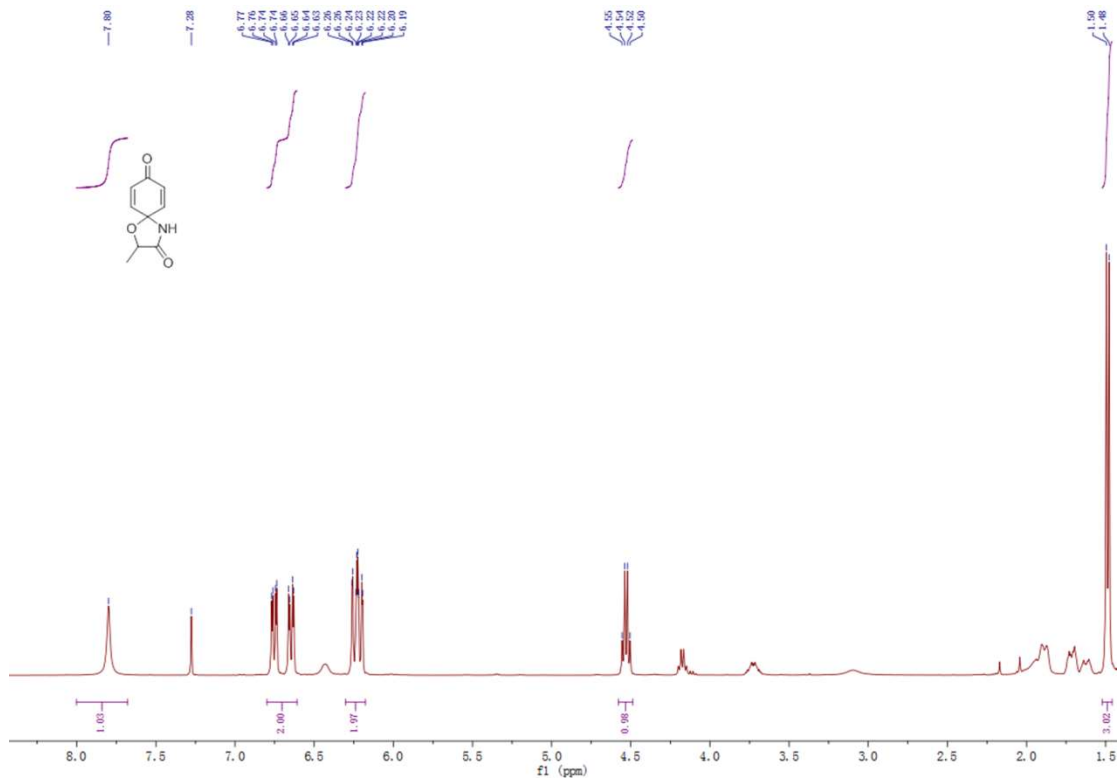

<sup>1</sup>H NMR spectra of compound 10b

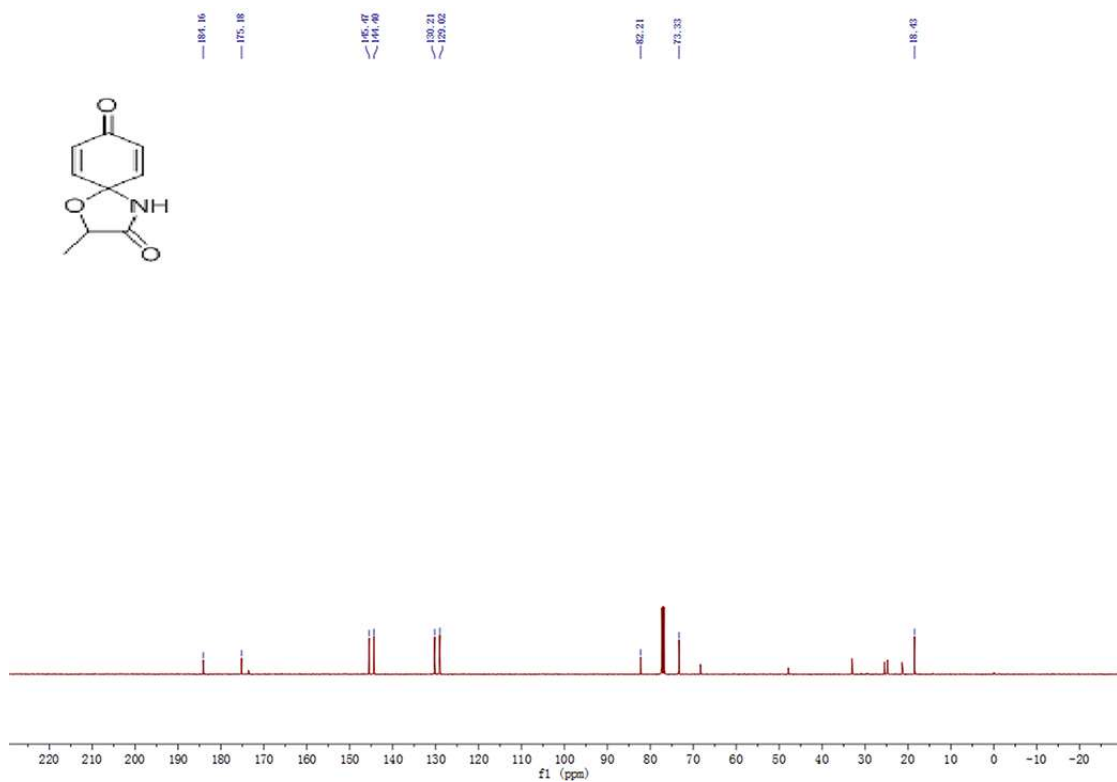

<sup>13</sup>C NMR spectra of compounds **10b**

Compound **11a**

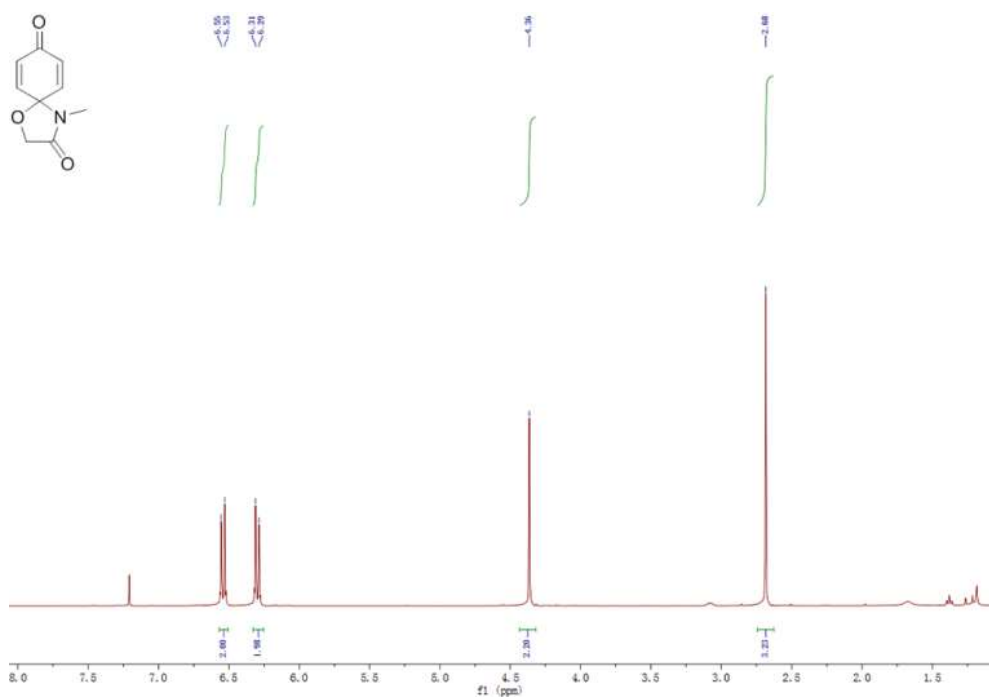

<sup>1</sup>H NMR spectra of compound **11a**

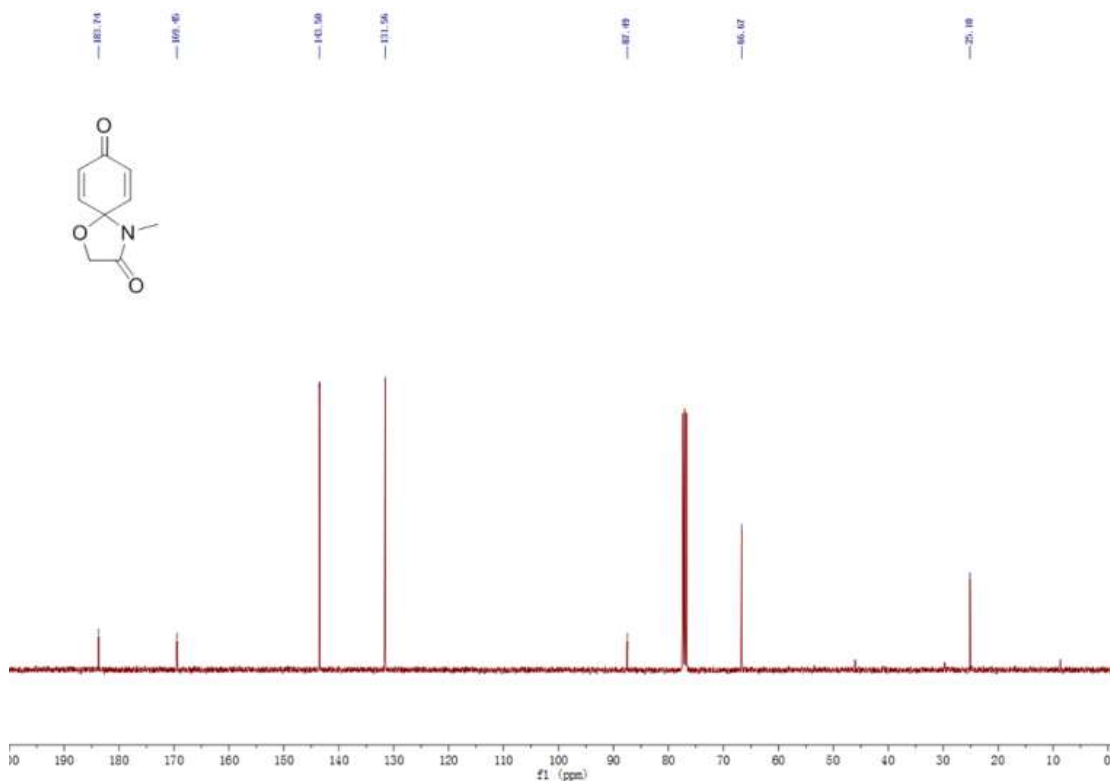

<sup>13</sup>C NMR spectra of compounds **11a**

Compound **11b**

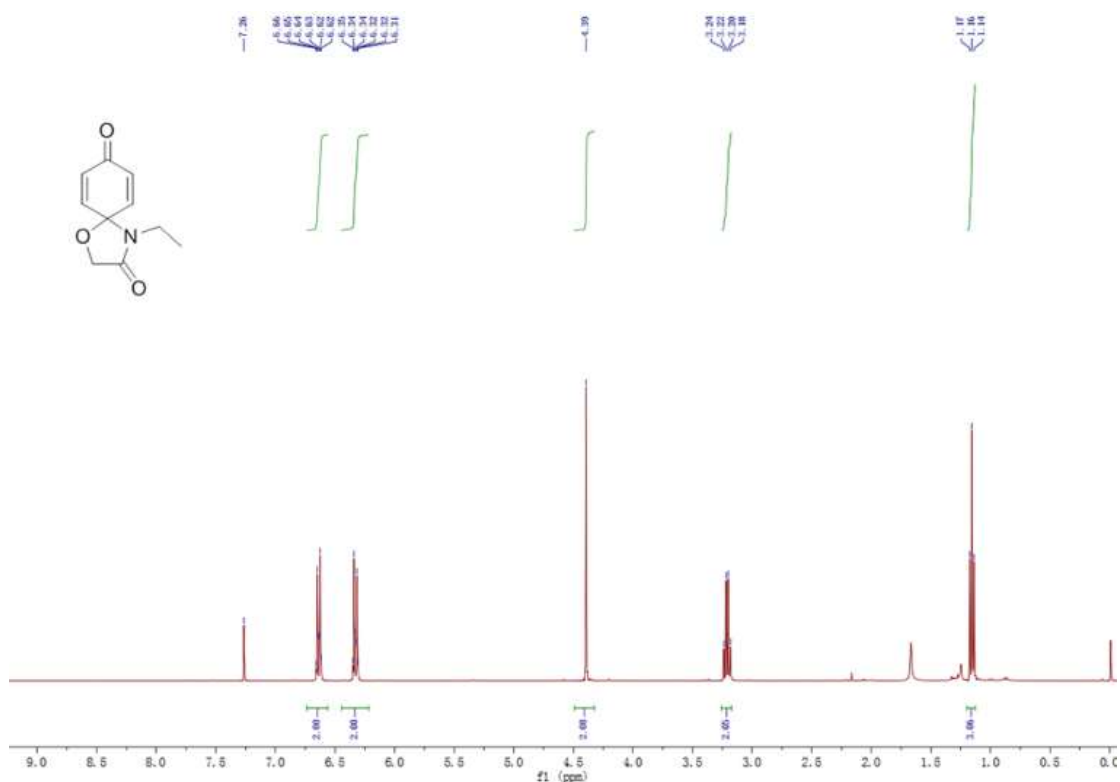

<sup>1</sup>H NMR spectra of compound **11b**

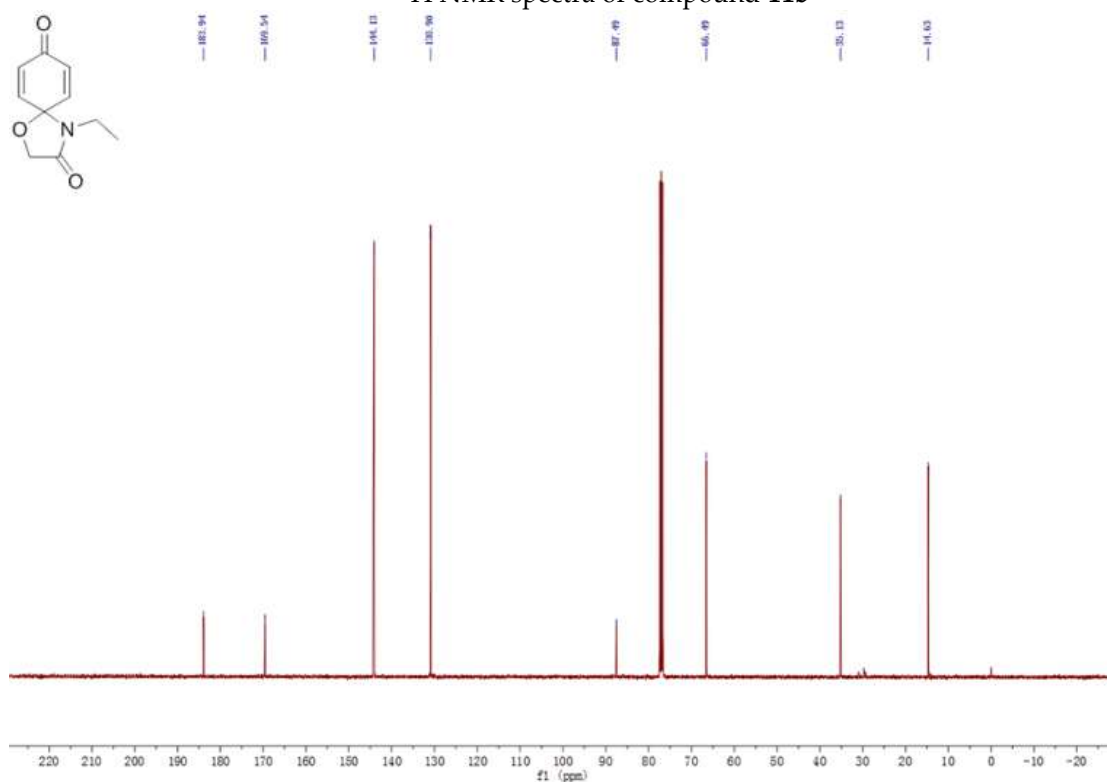

<sup>13</sup>C NMR spectra of compounds **11b**

Compound 11c

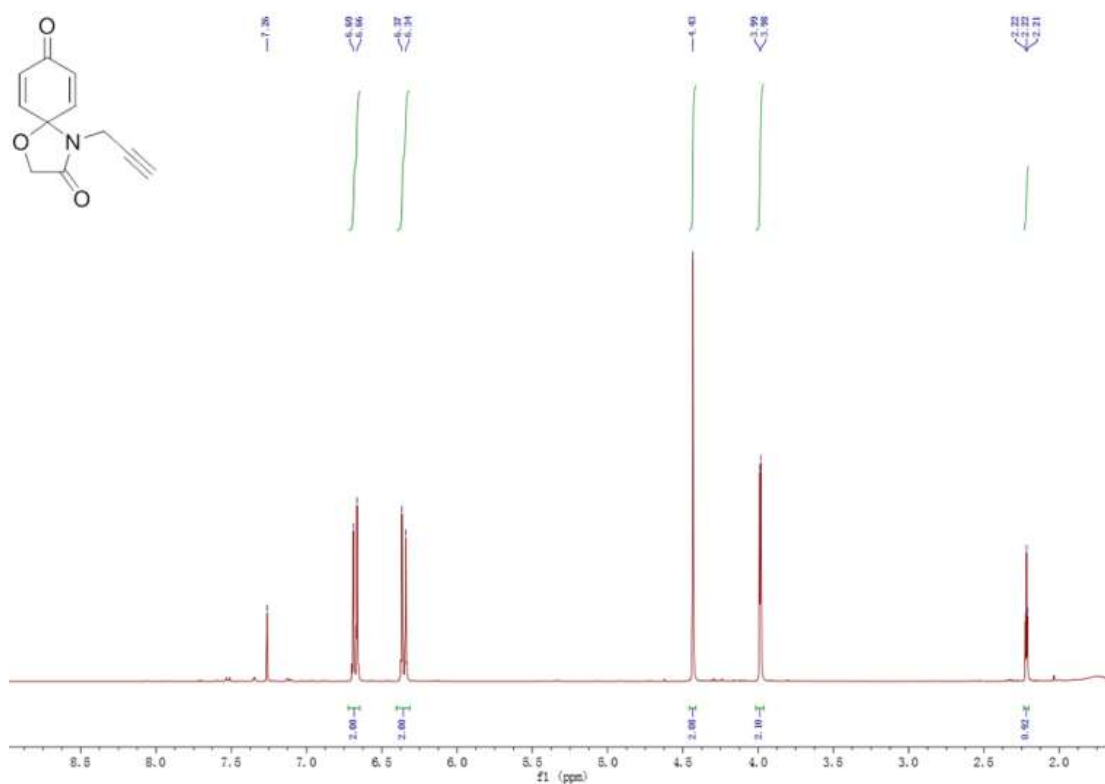

<sup>1</sup>H NMR spectra of compound 11c

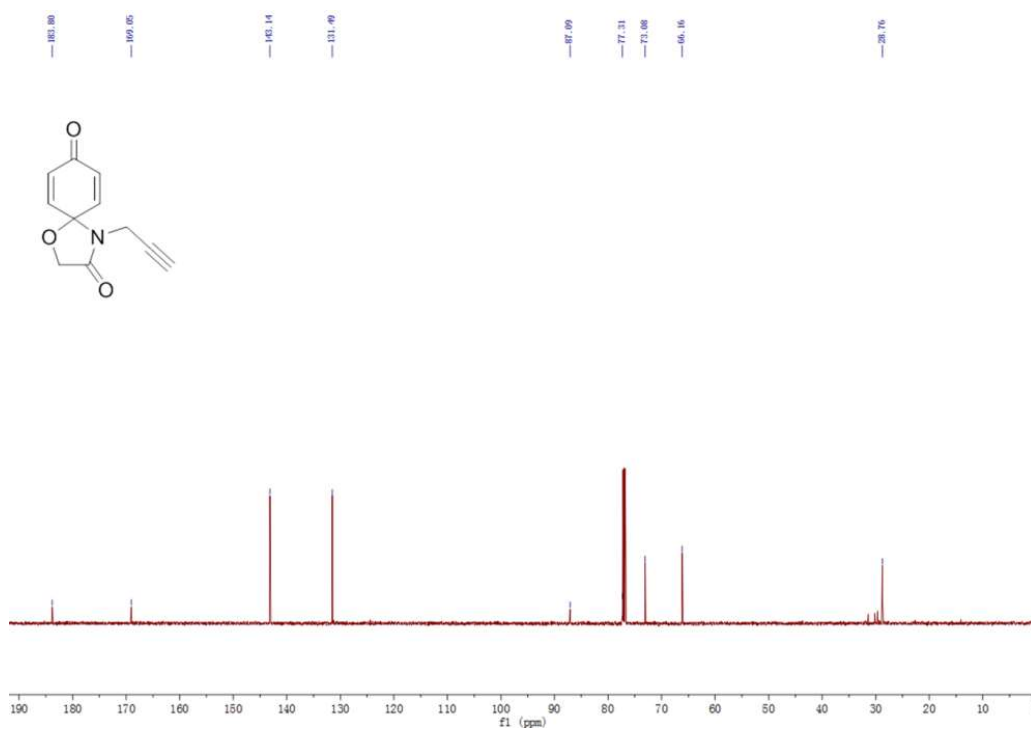

<sup>13</sup>C NMR spectra of compounds 11c

Compound 11d

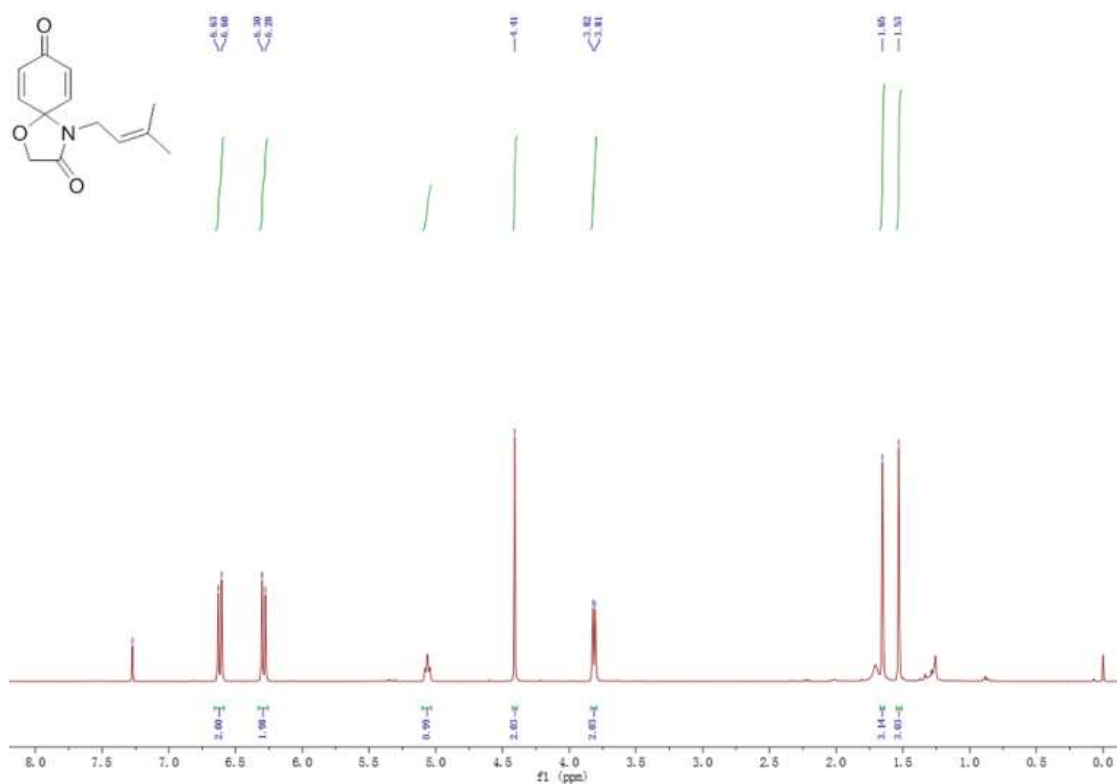

<sup>1</sup>H NMR spectra of compound **11d**

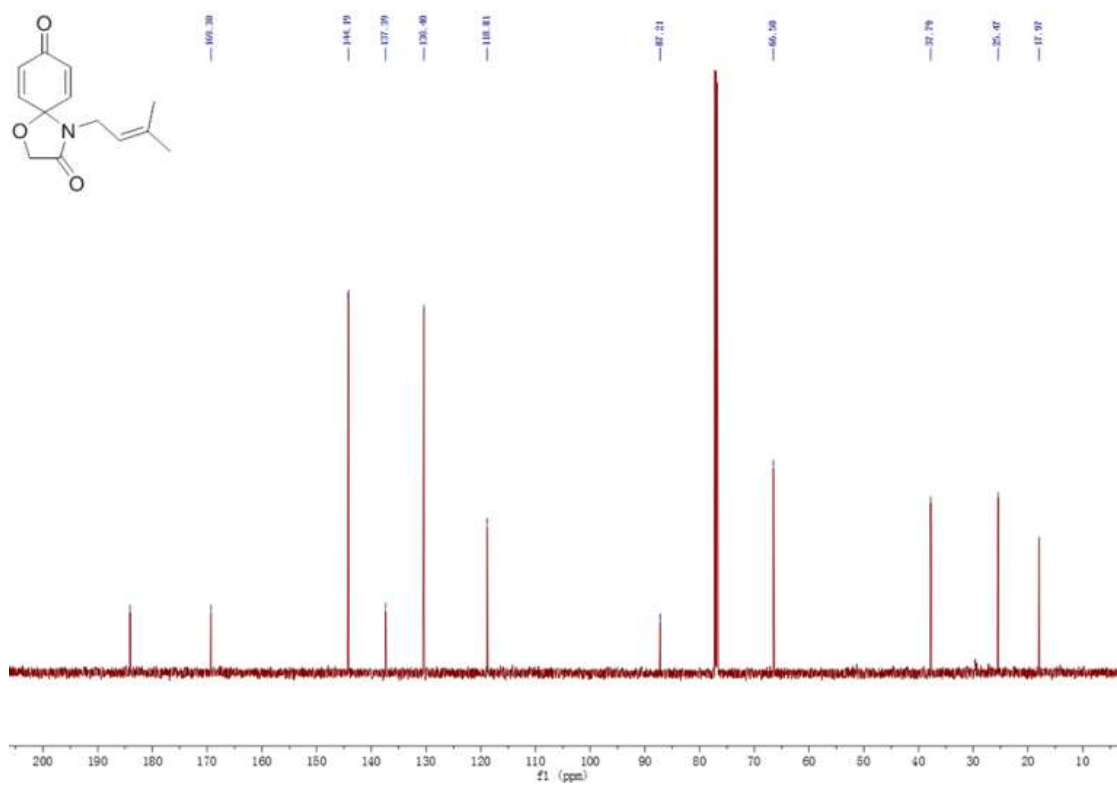

<sup>13</sup>C NMR spectra of compounds **11d**

Compound **11e**

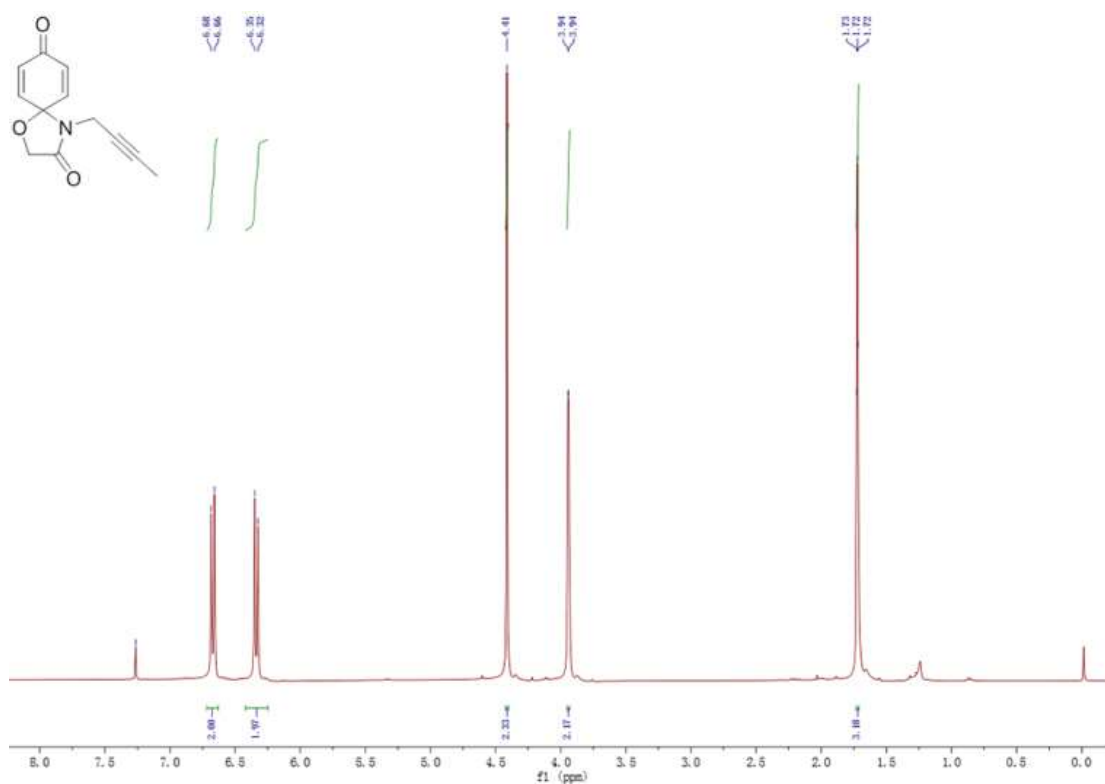

<sup>1</sup>H NMR spectra of compound **11e**

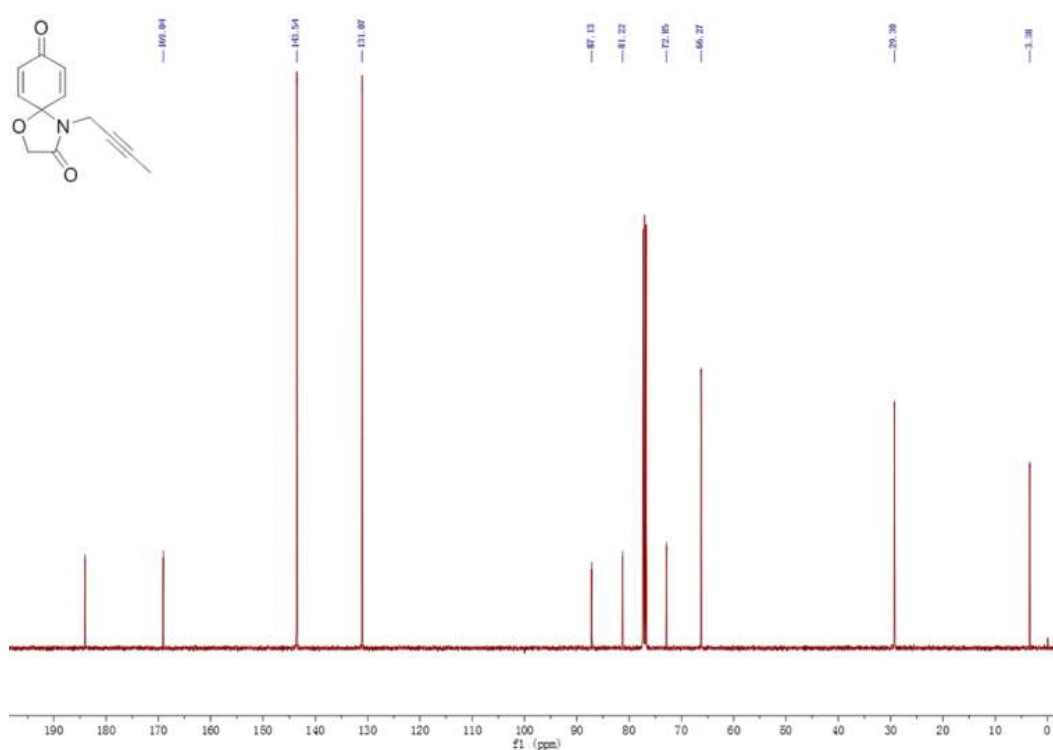

<sup>13</sup>C NMR spectra of compounds **11e**



Compound **11f**

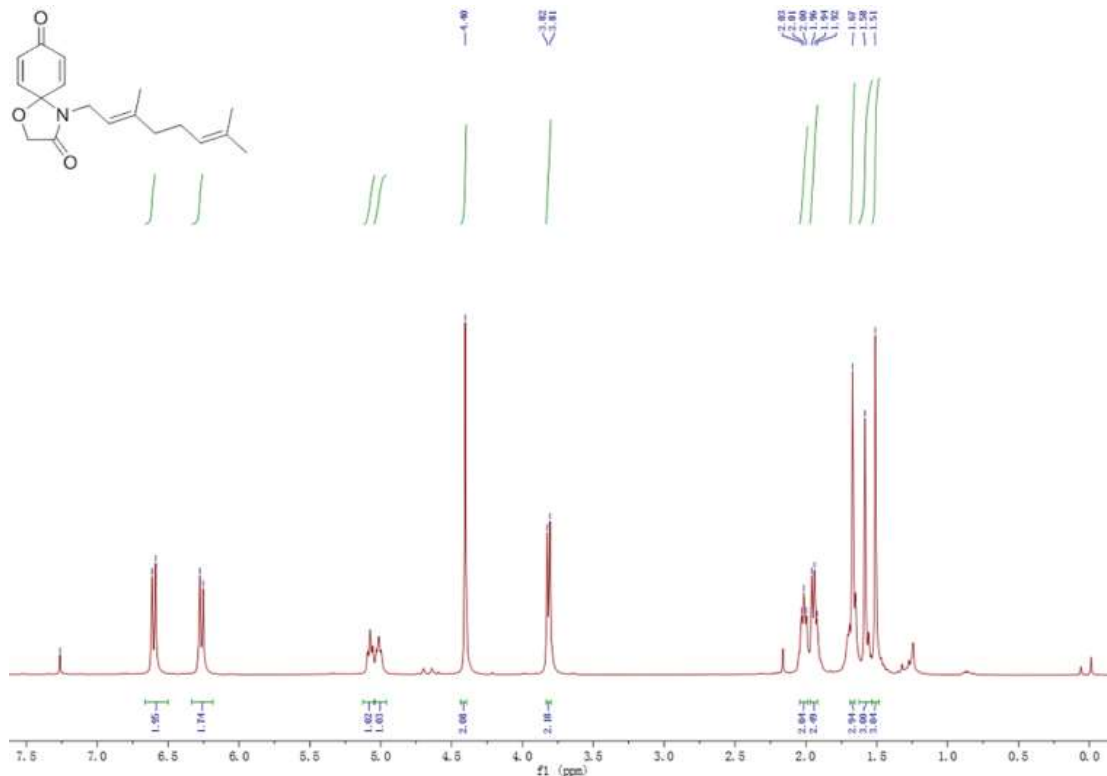

<sup>1</sup>H NMR spectra of compound **11f**

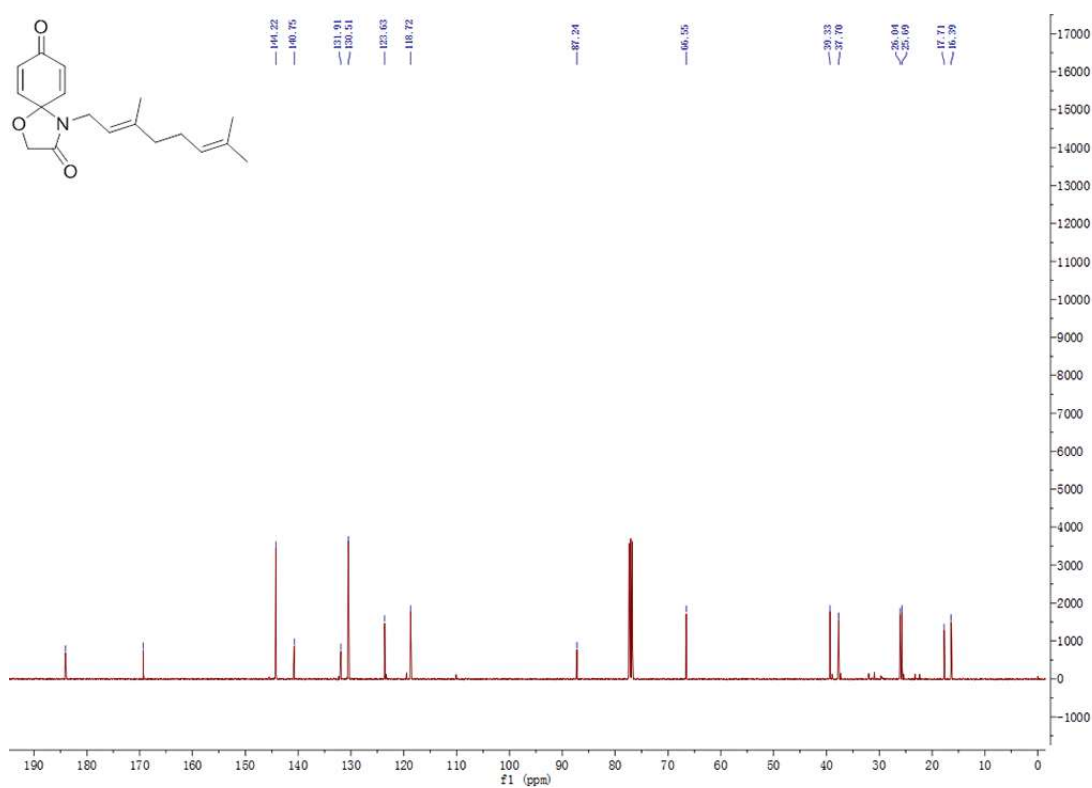

<sup>13</sup>C NMR spectra of compounds **11f**

Compound **11g**

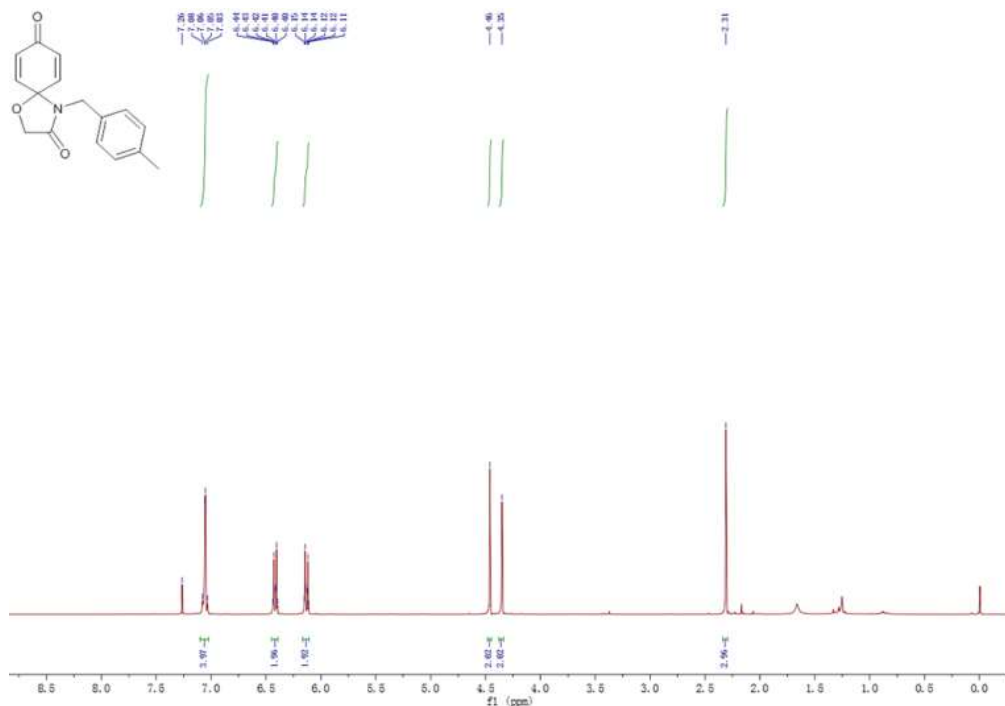

<sup>1</sup>H NMR spectra of compound **11g**

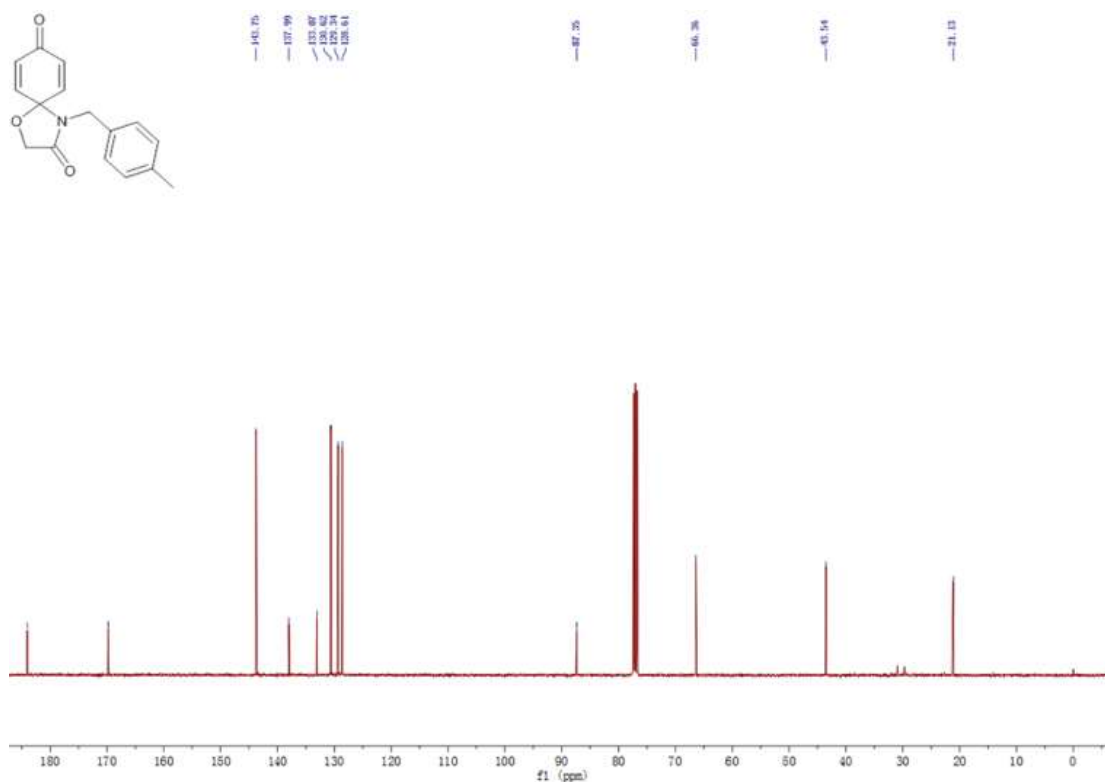

<sup>13</sup>C NMR spectra of compounds **11g**

Compound **11h**

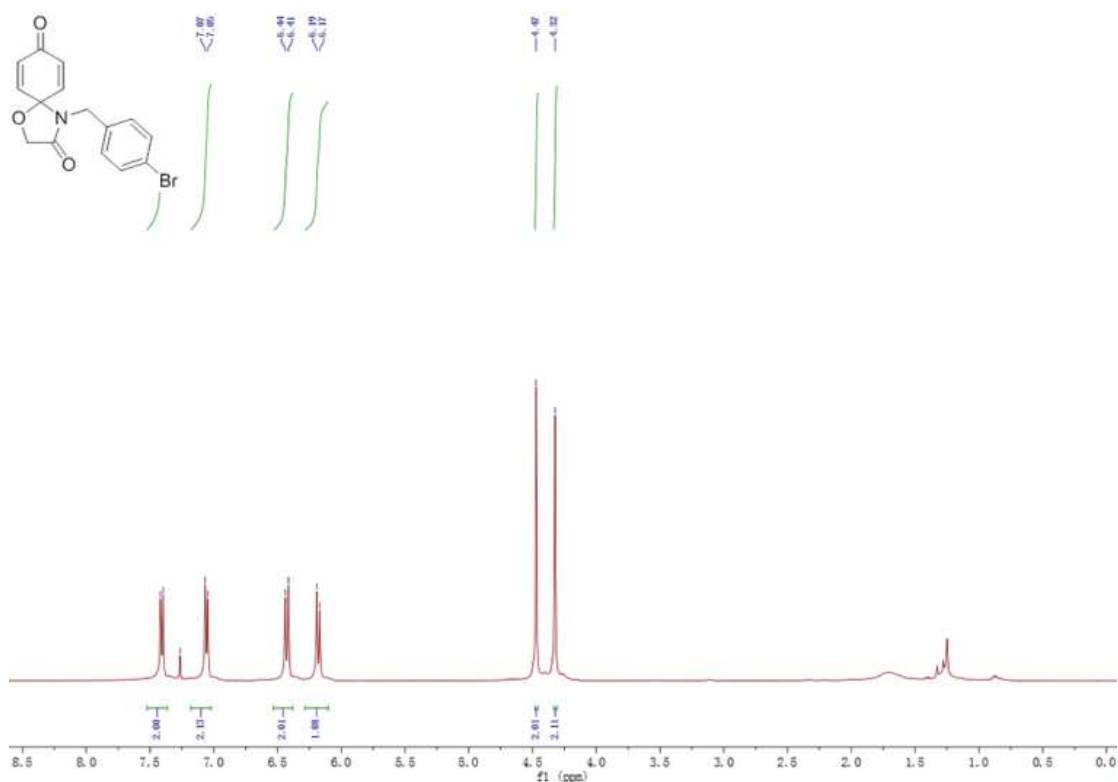

<sup>1</sup>H NMR spectra of compound **11h**

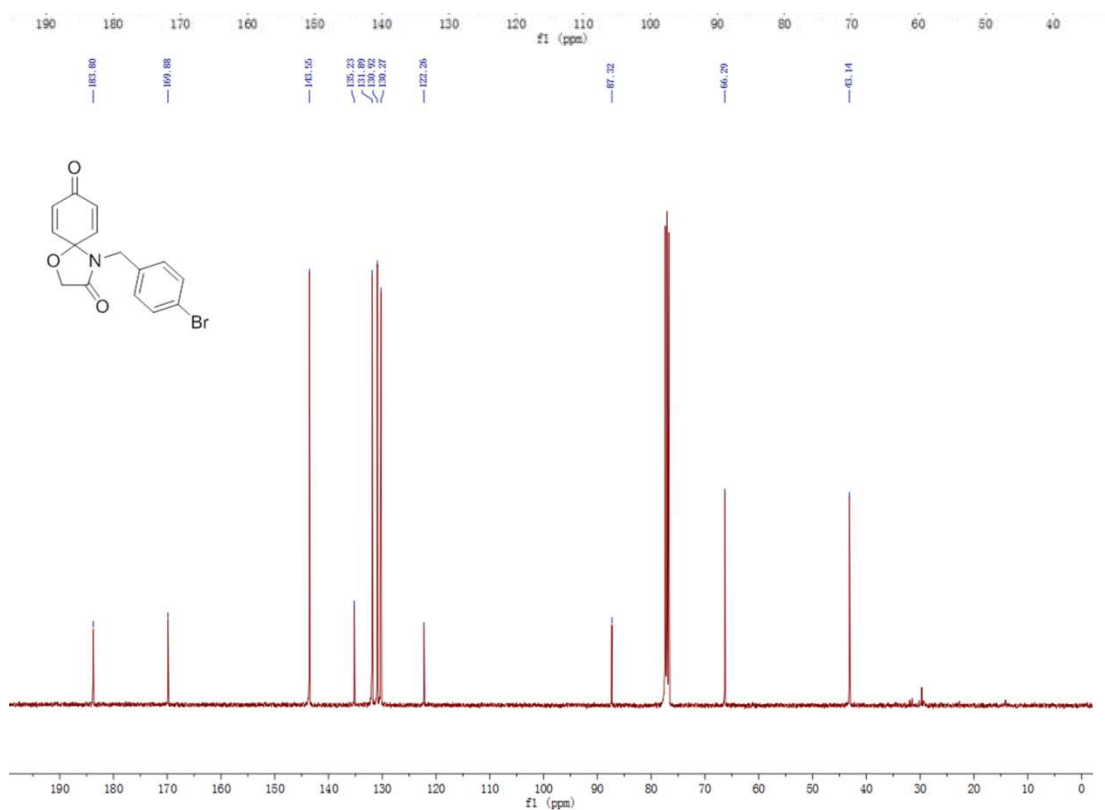

<sup>13</sup>C NMR spectra of compounds **11h**

Compound **11i**

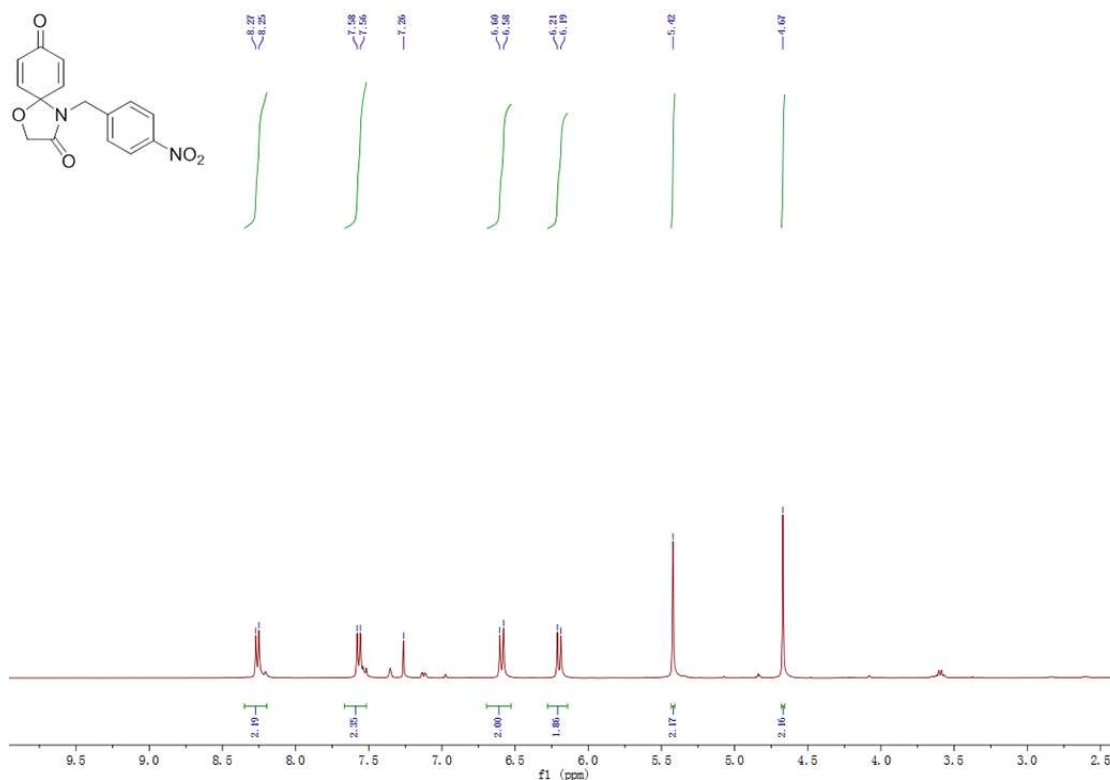

<sup>1</sup>H NMR spectra of compound **11i**

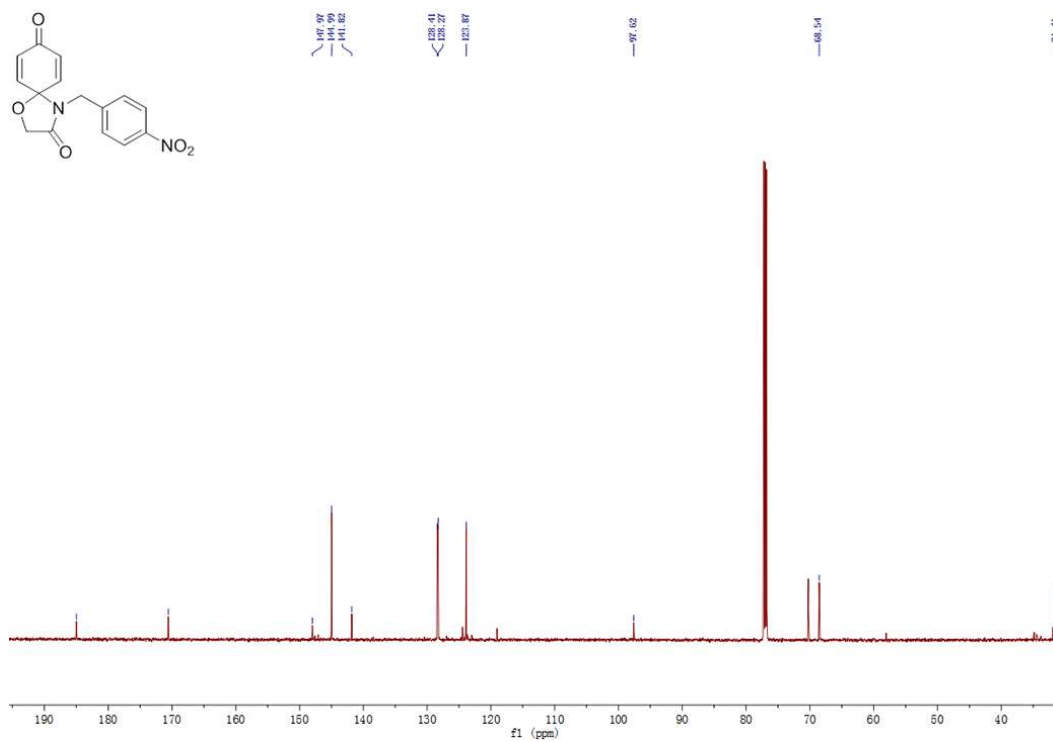

<sup>13</sup>C NMR spectra of compounds **11i**

Compound **11j**

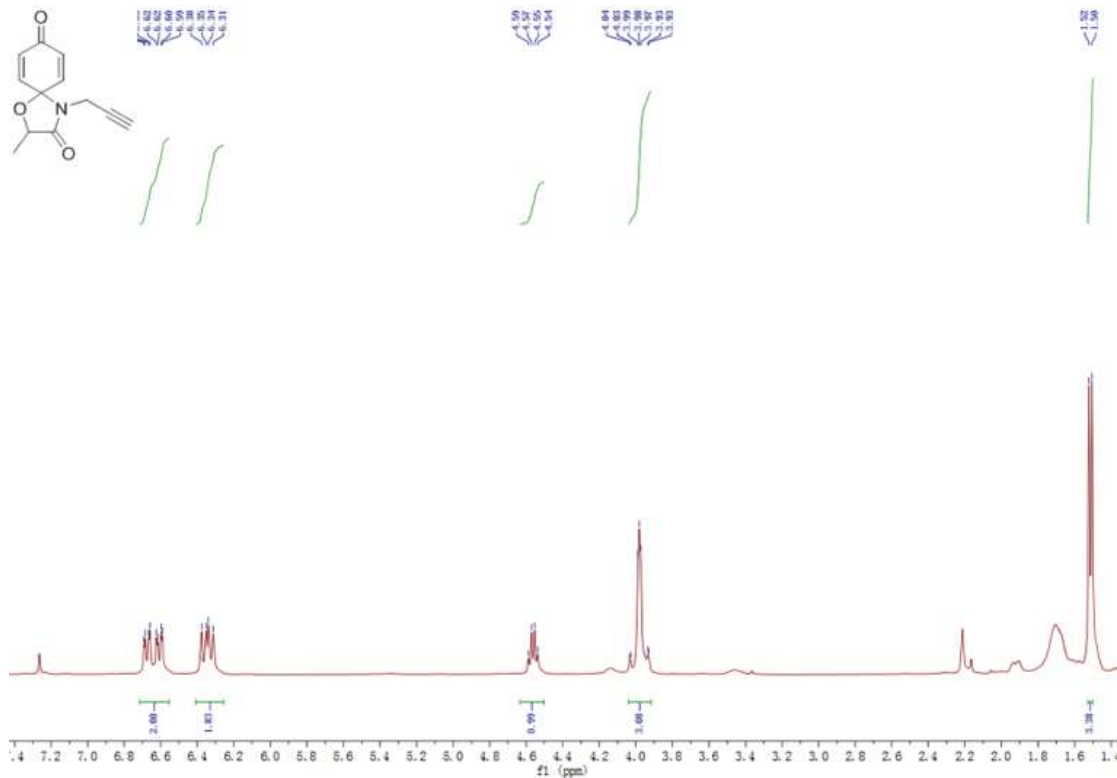<sup>1</sup>H NMR spectra of compound **11j**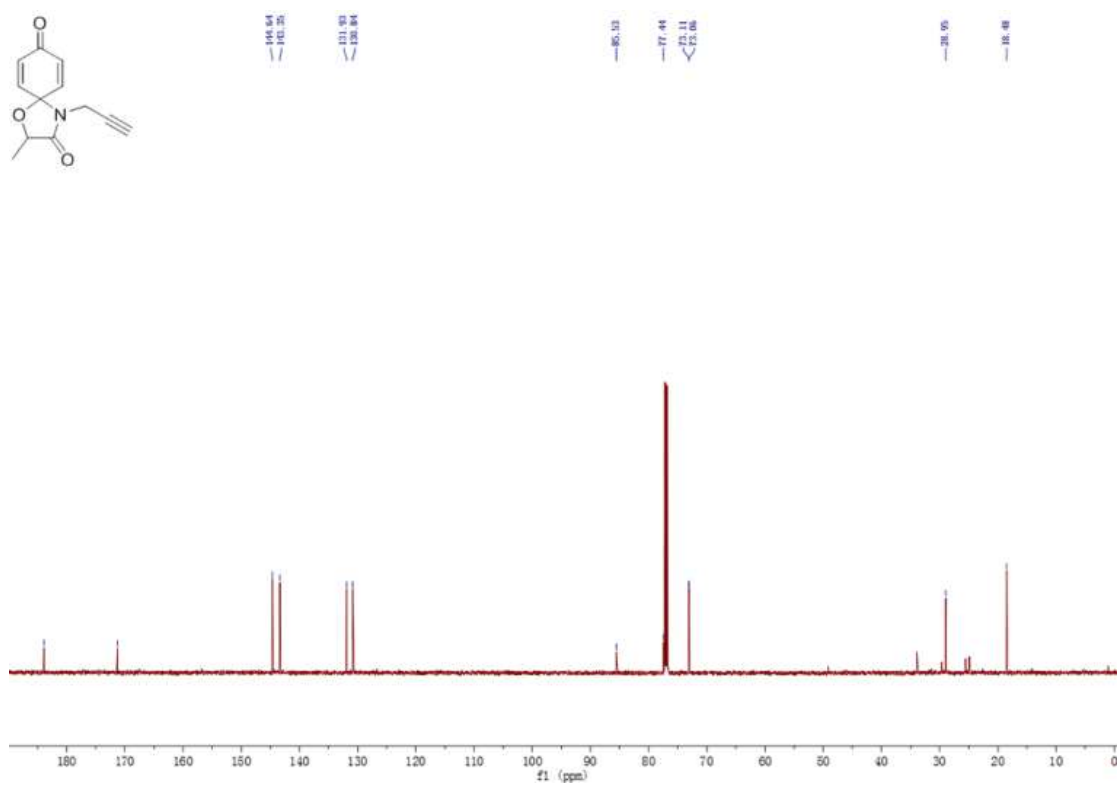

<sup>13</sup>C NMR spectra of compounds **11j**

Compound **11k**

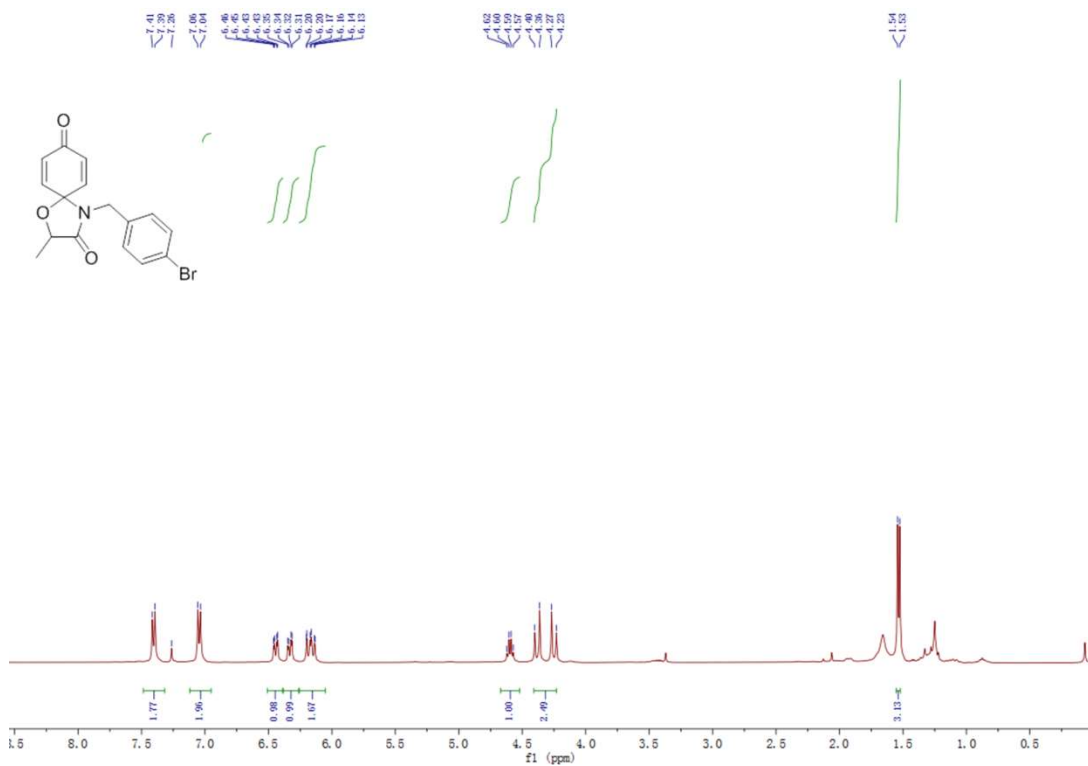

<sup>1</sup>H NMR spectra of compound **11k**

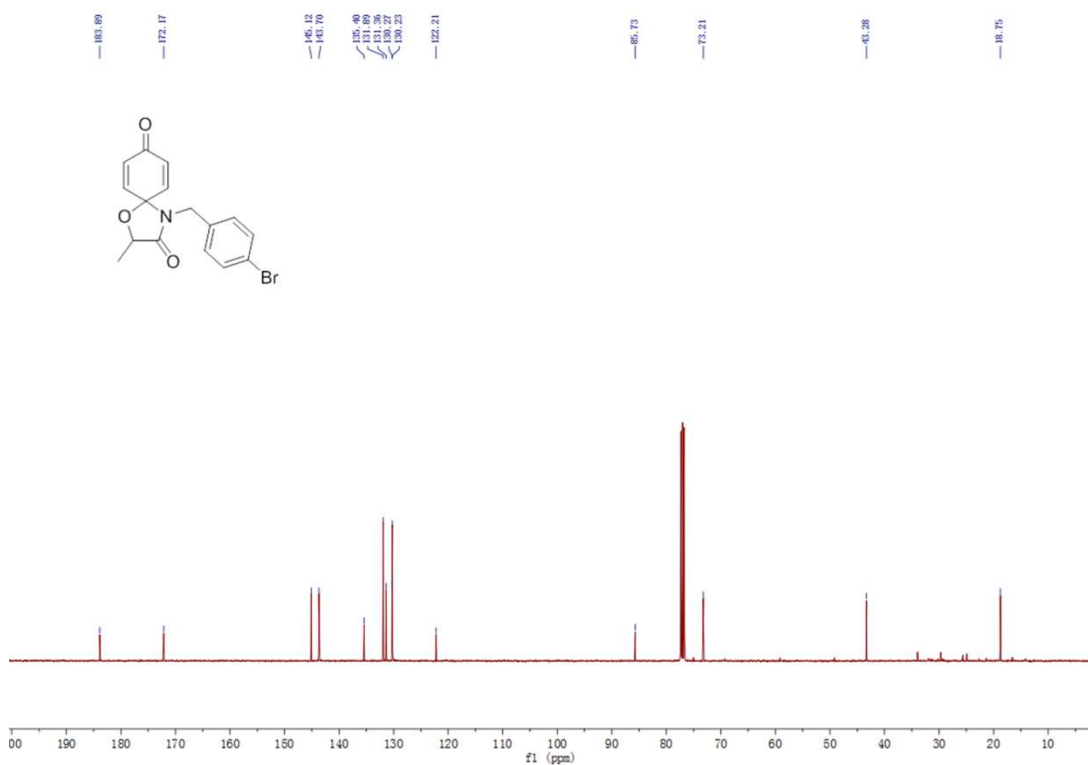

<sup>13</sup>C NMR spectra of compounds **11k**

Compound **12a**

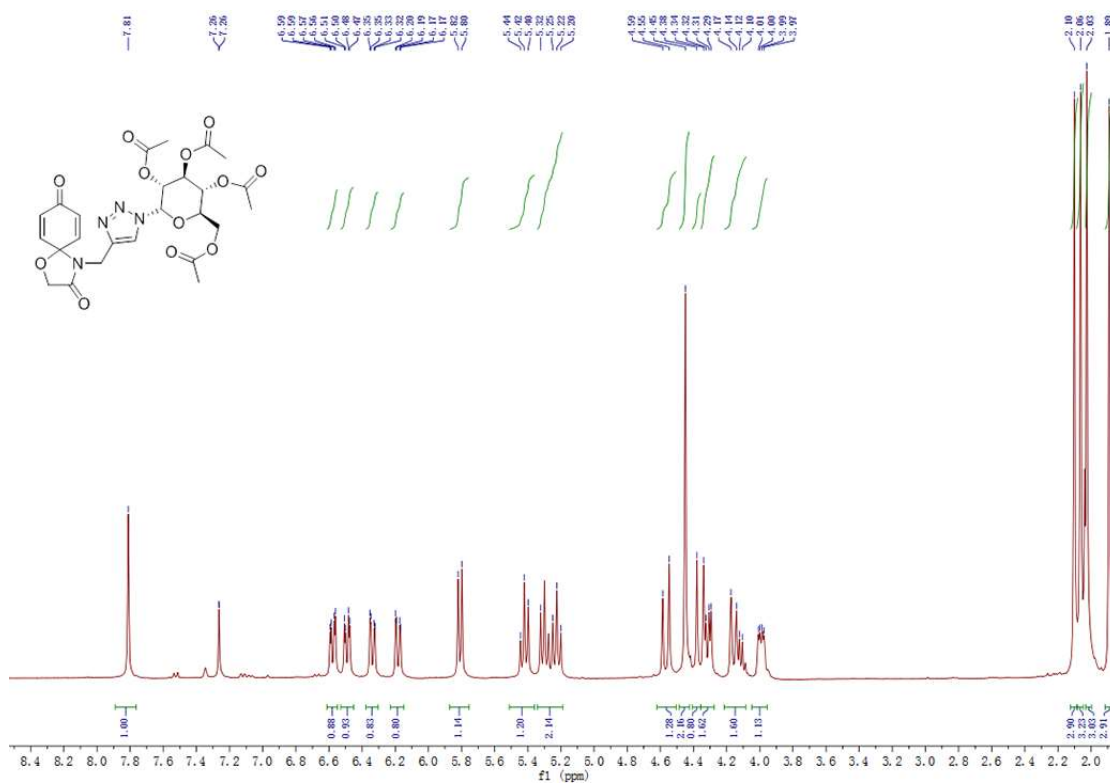

<sup>1</sup>H NMR spectra of compound **12a**

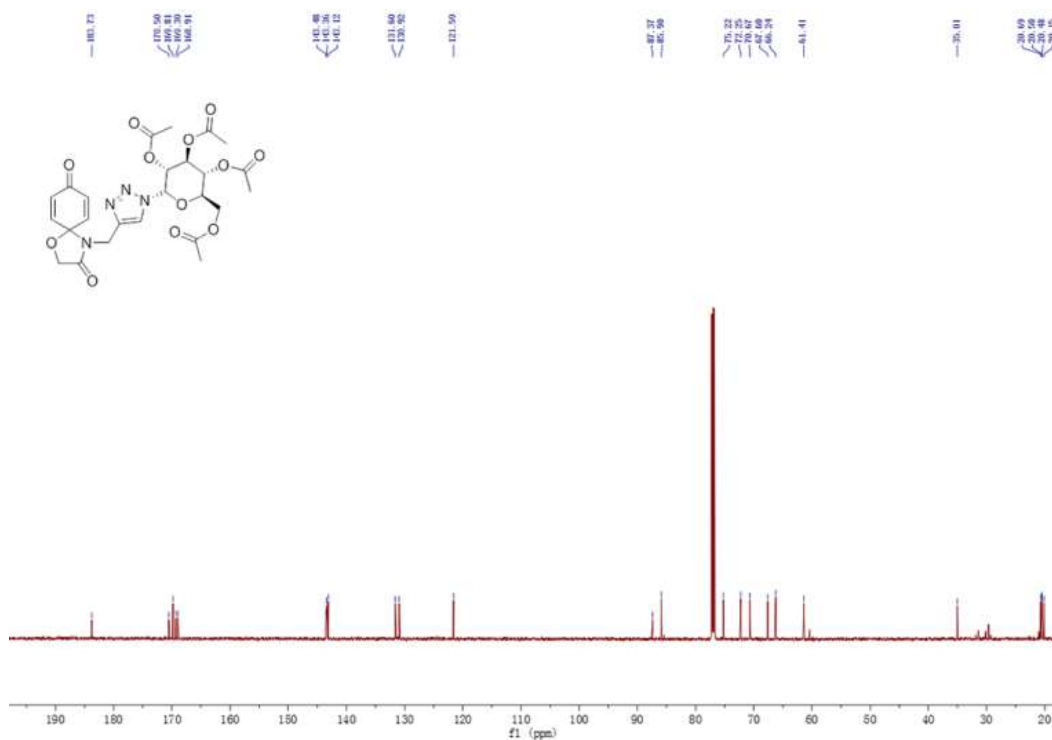

<sup>13</sup>C NMR spectra of compounds **12a**

Compound **12b**

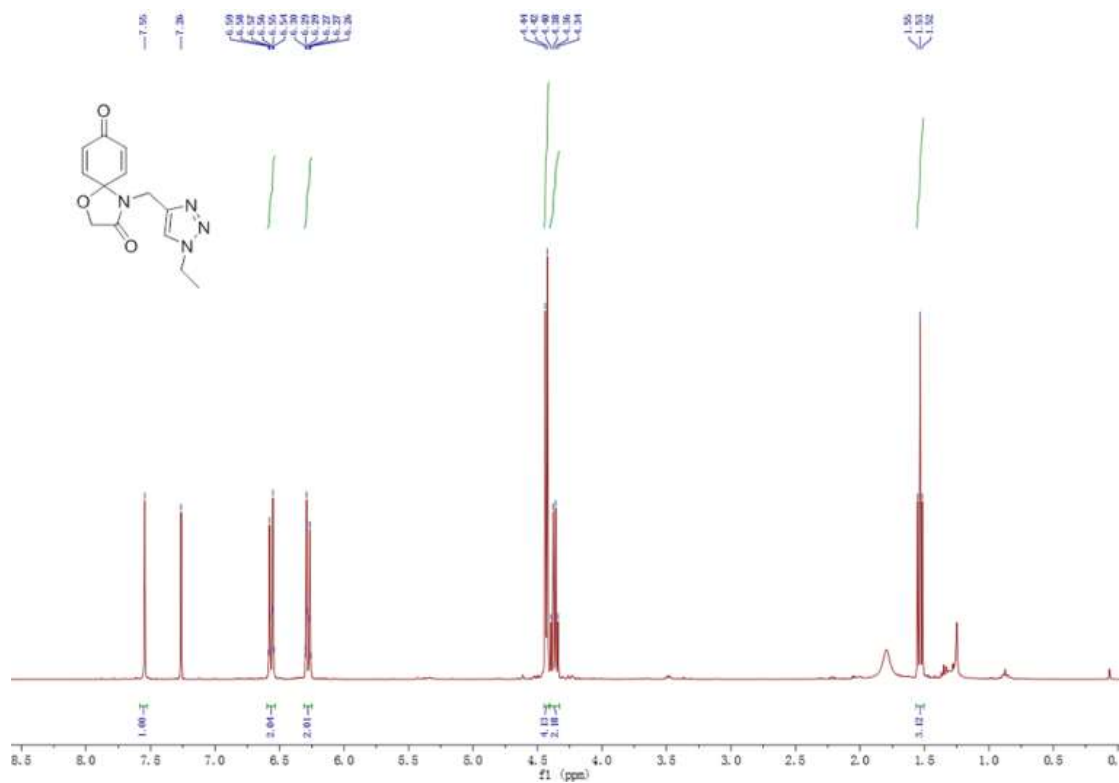

<sup>1</sup>H NMR spectra of compound **12b**



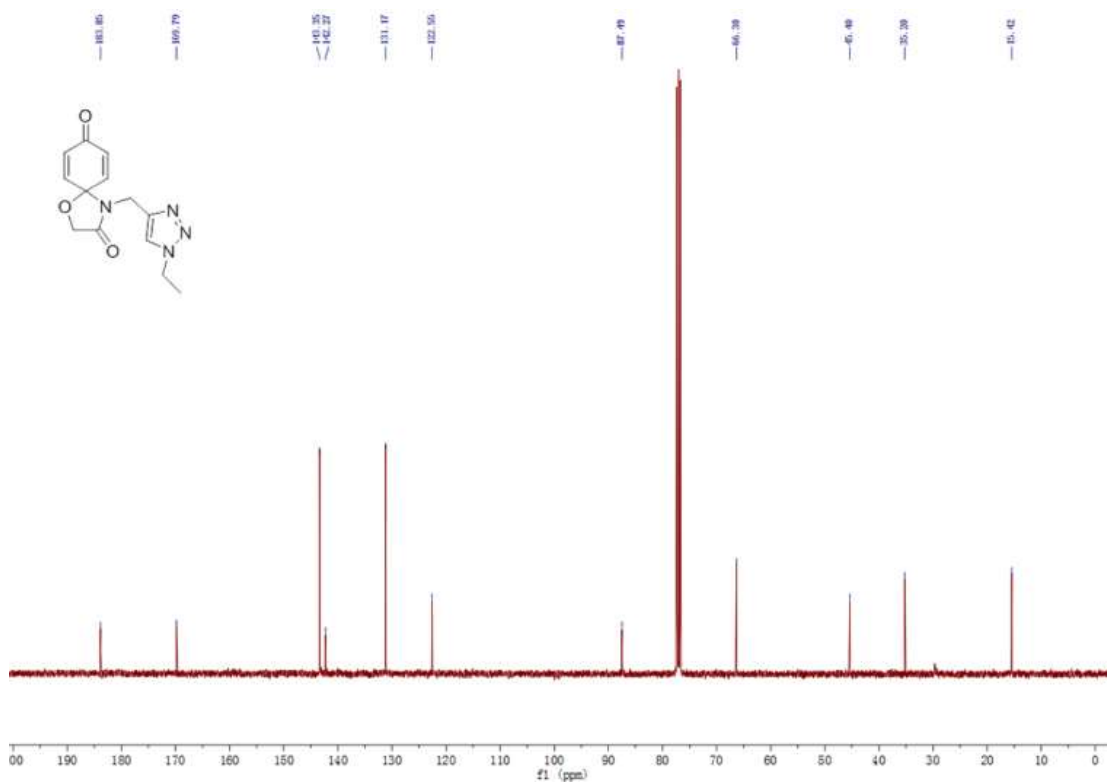

<sup>13</sup>C NMR spectra of compounds **12b**

Compound **12c**

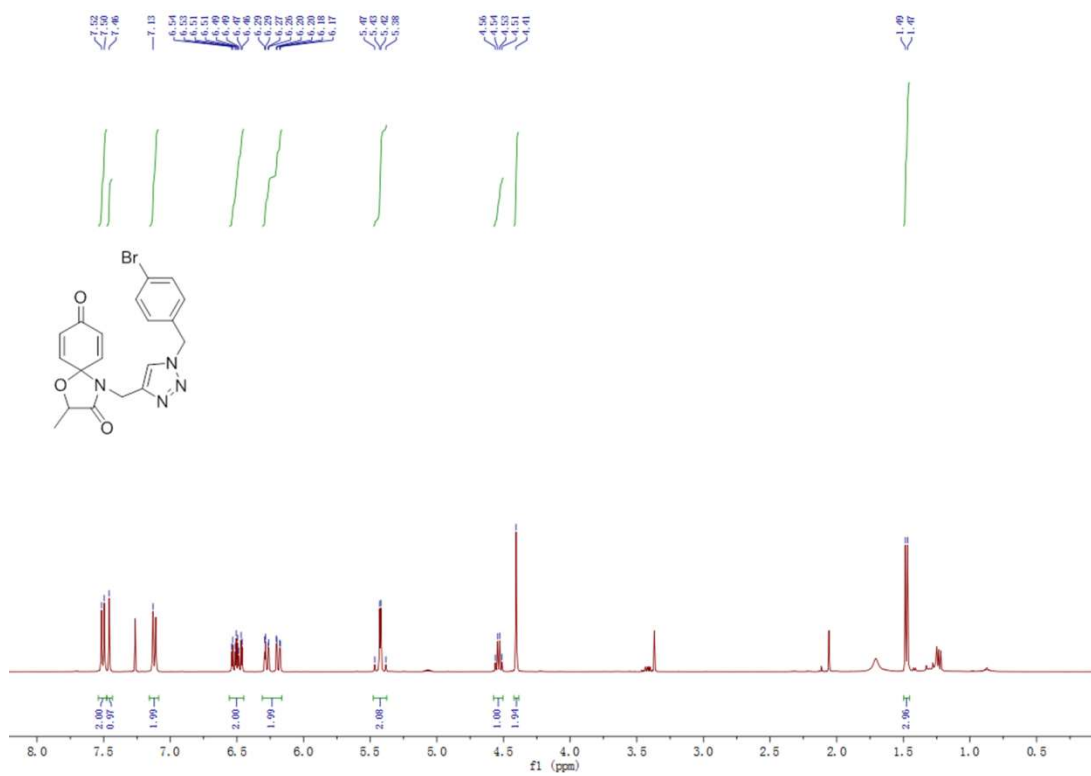

<sup>1</sup>H NMR spectra of compound **12c**

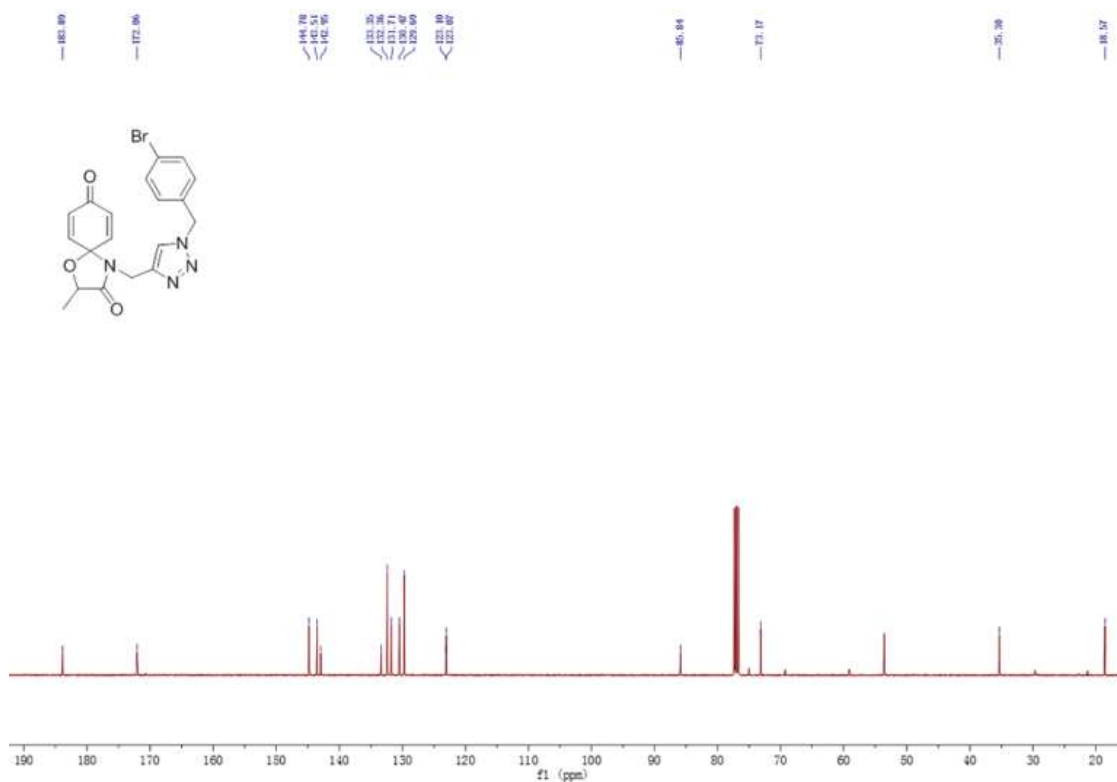

<sup>13</sup>C NMR spectra of compounds **12c**

Compound **12d**

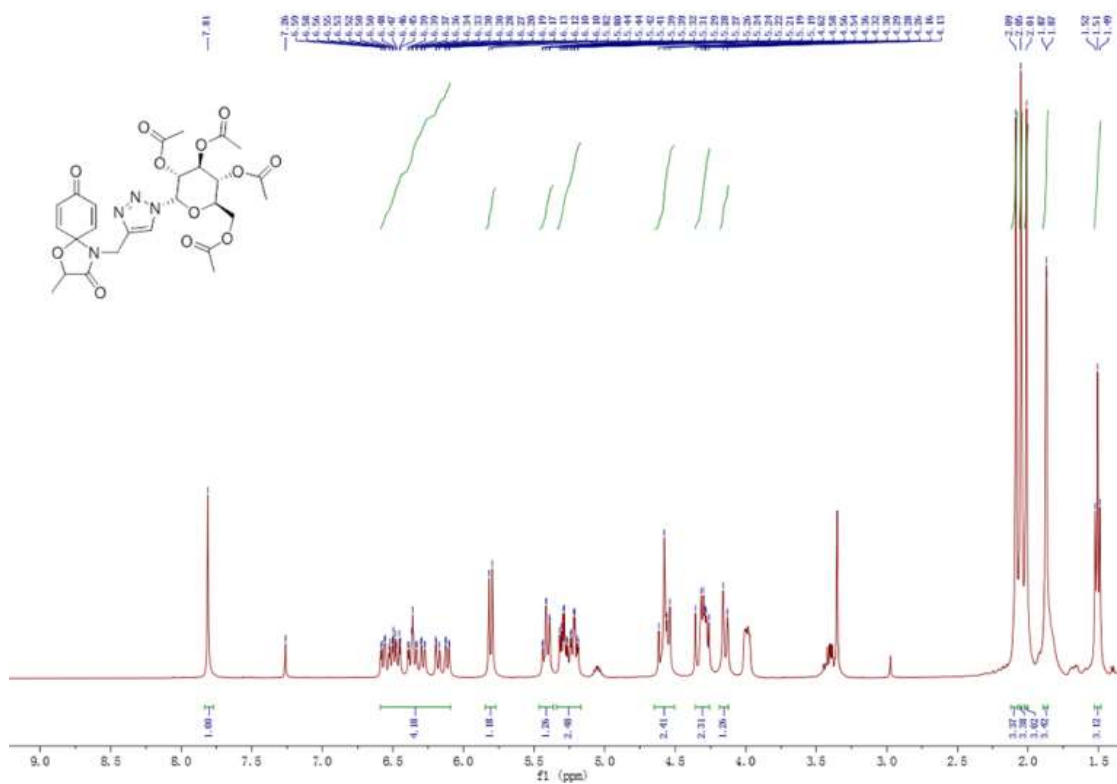

Supplement: s1 [file s1]
